# Supplementary material
Source: PubMed Central journal article supplement (PMC4664185)

# APPENDICES

## Supplemental Table 1: Questions Included in the Survey

| Survey Questions |                                                                                                                                                                                                                                      |
|------------------|--------------------------------------------------------------------------------------------------------------------------------------------------------------------------------------------------------------------------------------|
| 1                | How Familiar Are you with the Newly Issued AHA and ACC guidelines for diagnosis and treatment of cholesterol disorders in November of 2013?                                                                                          |
| 2                | Have you implemented these guidelines with adult patients in your clinical practice?                                                                                                                                                 |
| 3                | If you have not implemented these guidelines with most of your adult patients, are you planning to?                                                                                                                                  |
| 4                | If you are not planning to implement these guidelines with most of your adult patients, or not sure whether you want to, why not?                                                                                                    |
| 5                | Do you think there is a need for better evidence-based online tools to help you engage your adult patients in shared decisions about cholesterol treatment?                                                                          |
| 6                | If there were a good evidence-based online tool to help you engage in shared decision about cholesterol treatment with adult patients, how likely would you be to use it regularly in practice?                                      |
| 7                | Is there anything else you would like to tell us about the new cholesterol guidelines for adult patients, the use of online risk calculators in your practice, or what would help you best in the clinical treatment of cholesterol? |

**Supplemental Figure 1: Plan to Implement the New ACC/AHA Guidelines for Many of Their Adult Patients**

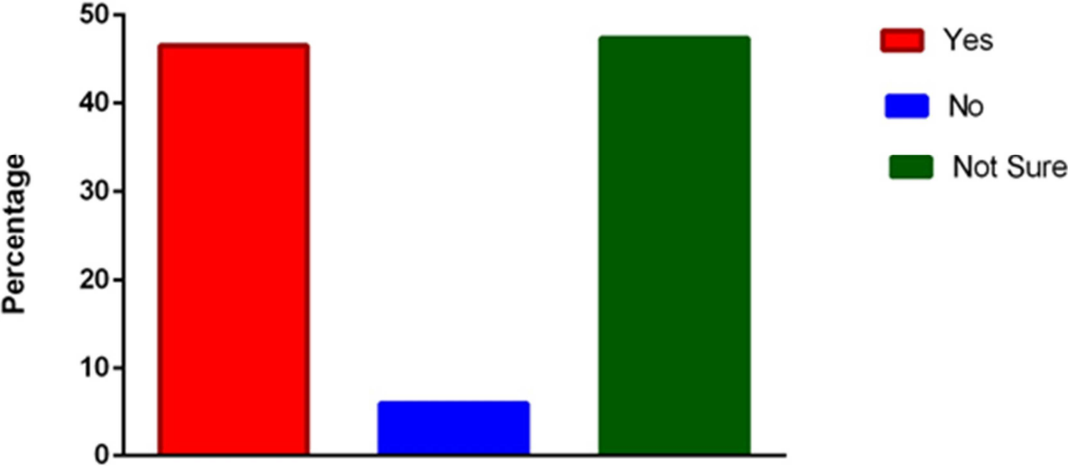

**Supplemental Figure 2: Need for Better Evidence-Based Online Tool for Shared Decision Making.**

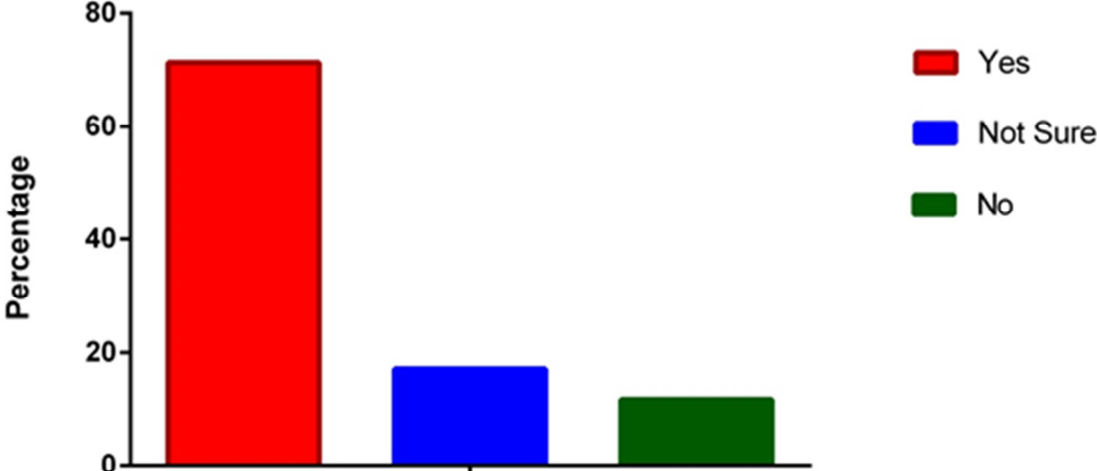

**Supplemental Figure 3: Likelihood of Regularly Using an Online Evidence-Based Tool for Shared Decision Making about Cholesterol Management.**

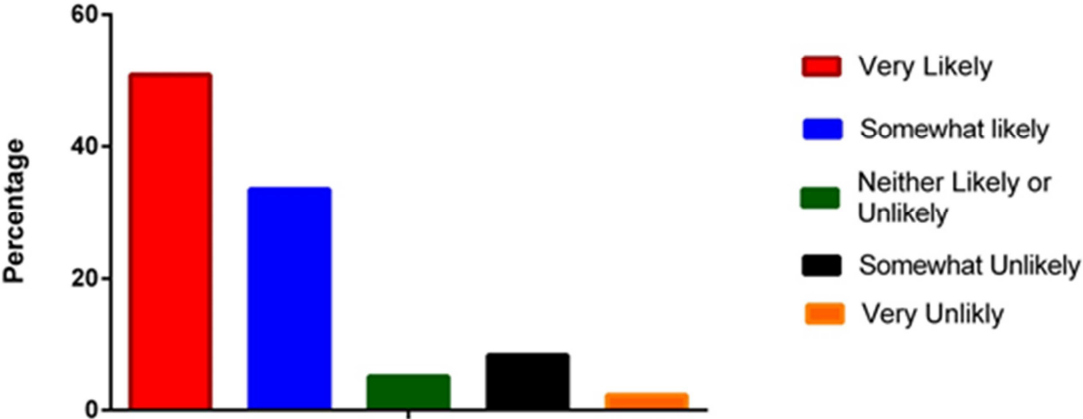

Supplement: NIHMS692118-supplement-01.pdf [file NIHMS692118-supplement-01.pdf]
